# Supplementary material
Source: Springer Nature journal article supplement (https://www.springermedizin.de/resource/supplementary/12982_2009_82_MOESM4_ESM.pdf/9604432)

Efficacy Dilution Source: Adherence

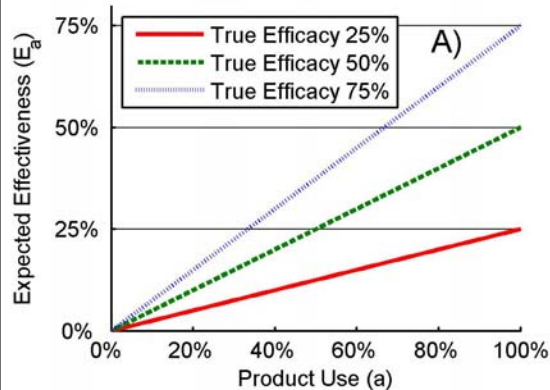

Efficacy Dilution Source: Anal Intercourse

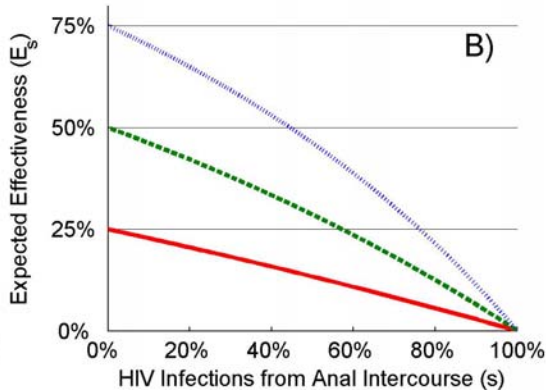

Efficacy Dilution Source: Time Off Product

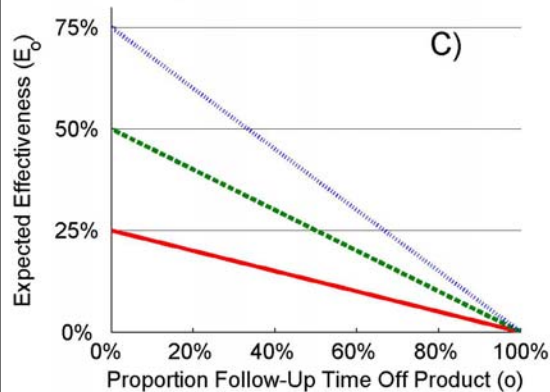

Efficacy Dilution Source: Placebo Gel Efficacy

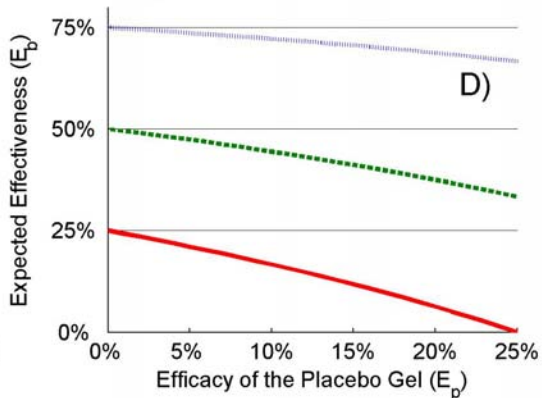

Supplement: MOESM4 [file 9604432]
